# Supplementary material for: Treatment patterns and satisfaction in patients with type 2 diabetes newly initiating oral monotherapy with antidiabetic drugs in Japan: results from the prospective Real-world Observational Study on Patient Outcomes in Diabetes (RESPOND)
Source: PubMed Central journal article supplement — BMJ Open Diabetes Res Care. 2022 Dec 30;10(6):e003032. doi: 10.1136/bmjdrc-2022-003032 (PMC9809240; doi:10.1136/bmjdrc-2022-003032), 2022-12-30
Supplement: bmjdrc-2022-003032supp001.pdf [file bmjdrc-2022-003032supp001.pdf]

## Supporting information

**Table S1.** Changes to baseline OAD by baseline characteristics

|                                  | Baseline category | Baseline N | Switch     |                      | Add-on     |                      |
|----------------------------------|-------------------|------------|------------|----------------------|------------|----------------------|
|                                  |                   |            | N (%)      | p-value <sup>†</sup> | N (%)      | p-value <sup>†</sup> |
| All patients                     |                   | 1474       | 204 (13.8) |                      | 319 (21.6) |                      |
| Age, years                       | <54               | 478        | 95 (19.9)  | 0.0001               | 121 (25.3) | 0.0001               |
|                                  | ≥54 to <66        | 471        | 69 (14.6)  |                      | 117 (24.8) |                      |
|                                  | ≥66               | 525        | 40 (7.6)   |                      | 81 (15.4)  |                      |
| Sex                              | Male              | 915        | 133 (14.5) | 0.3512               | 216 (23.6) | 0.0191               |
|                                  | Female            | 559        | 71 (12.7)  |                      | 103 (18.4) |                      |
| BMI, ‡ kg/m <sup>2</sup>         | <23.79            | 485        | 54 (11.1)  | 0.0808               | 97 (20.0)  | 0.1744               |
|                                  | ≥23.79 to <27.55  | 492        | 71 (14.4)  |                      | 101 (20.5) |                      |
|                                  | ≥27.55            | 494        | 79 (16.0)  |                      | 121 (24.5) |                      |
| HbA1c, ‡ %                       | <7                | 454        | 35 (7.7)   | 0.0001               | 40 (8.8)   | 0.0001               |
|                                  | ≥7 to <8.2        | 494        | 51 (10.3)  |                      | 88 (17.8)  |                      |
|                                  | ≥8.2              | 481        | 110 (22.9) |                      | 181 (37.6) |                      |
| Diabetes complications           | No                | 1279       | 165 (12.9) | 0.0102               | 257 (20.1) | 0.0004               |
|                                  | Yes               | 195        | 39 (20.0)  |                      | 62 (31.8)  |                      |
| CVD                              | No                | 1383       | 195 (14.1) | 0.3458               | 301 (21.8) | 0.7926               |
|                                  | Yes               | 91         | 9 (9.9)    |                      | 18 (19.8)  |                      |
| Dyslipidemia                     | No                | 619        | 97 (15.7)  | 0.0927               | 146 (23.6) | 0.1246               |
|                                  | Yes               | 855        | 107 (12.5) |                      | 173 (20.2) |                      |
| Hypertension                     | No                | 721        | 130 (18.0) | 0.0001               | 170 (23.6) | 0.0875               |
|                                  | Yes               | 753        | 74 (9.8)   |                      | 149 (19.8) |                      |
| Other comorbidities <sup>§</sup> | No                | 1006       | 154 (15.3) | 0.0186               | 240 (23.9) | 0.0022               |

|                     |     |      |            |        |            |        |
|---------------------|-----|------|------------|--------|------------|--------|
|                     | Yes | 468  | 50 (10.7)  |        | 79 (16.9)  |        |
| Diabetes specialist | No  | 840  | 74 (8.8)   | 0.0001 | 176 (21.0) | 0.4824 |
|                     | Yes | 634  | 130 (20.5) |        | 143 (22.6) |        |
| Cardiologist        | No  | 1169 | 173 (14.8) | 0.0402 | 258 (22.1) | 0.4823 |
|                     | Yes | 305  | 31 (10.2)  |        | 61 (20.0)  |        |

BMI, body mass index; CVD, cardiovascular disease; HbA1c, hemoglobin A1c; OAD, oral antidiabetic drug

†Calculated using Fisher's exact test and Chi-square test for pairwise and multiple comparison, respectively

‡For patients with available data

§Most common comorbidities were liver disease, cerebrovascular disease, atrial fibrillation, chronic kidney disease and peptic ulcer disease, excluding those categorized as diabetes complications, CVD, dyslipidemia and hypertension

**Table S2.** Individualized target attainment rate by baseline characteristic

|                           | Baseline category | HbA1c (%) |              | Individualized target<br>HbA1c (%) | Target attainment    |                    |                      |                    |                      |                    |                      |                    |                      |
|---------------------------|-------------------|-----------|--------------|------------------------------------|----------------------|--------------------|----------------------|--------------------|----------------------|--------------------|----------------------|--------------------|----------------------|
|                           |                   | N         | Mean (SD)    |                                    | p-value <sup>†</sup> | 6 months           |                      | 12 months          |                      | 18 months          |                      | 24 months          |                      |
|                           |                   |           |              |                                    |                      | n/N (%)            | P-value <sup>‡</sup> |
| All patients <sup>§</sup> |                   | 1429      | 8.08 (1.83)  |                                    | 6.51 (0.52)          | 455/1270<br>(35.8) |                      | 444/1186<br>(37.4) |                      | 412/1122<br>(36.7) |                      | 381/1068<br>(35.7) |                      |
| Age, years                | <54               | 452       | 8.63 (2.05)  | 0.0001                             | 6.58 (0.63)          | 141/395<br>(35.7)  | 0.4062               | 134/364<br>(36.8)  | 0.6201               | 123/337<br>(36.5)  | 0.5430               | 97/309<br>(31.4)   | 0.0113               |
|                           | ≥54, <66          | 460       | 8.15 (1.91)  |                                    | 6.49 (0.45)          | 138/411<br>(33.6)  |                      | 141/391<br>(36.1)  |                      | 131/376<br>(34.8)  |                      | 120/362<br>(33.1)  |                      |
|                           | ≥66               | 517       | 7.54 (1.34)  |                                    | 6.46 (0.44)          | 176/464<br>(37.9)  |                      | 169/431<br>(39.2)  |                      | 158/409<br>(38.6)  |                      | 164/397<br>(41.3)  |                      |
| Sex                       | Male              | 878       | 8.25 (1.90)  | 0.0001                             | 6.54 (0.56)          | 277/776<br>(35.7)  | 0.9046               | 261/717<br>(36.4)  | 0.3904               | 238/671<br>(35.5)  | 0.3123               | 234/633<br>(37.0)  | 0.2988               |
|                           | Female            | 551       | 7.82 (1.69)  |                                    | 6.46 (0.43)          | 178/494<br>(36.0)  |                      | 183/469<br>(39.0)  |                      | 174/451<br>(38.6)  |                      | 147/435<br>(33.8)  |                      |
| BMI, kg/m <sup>2</sup>    | <23.79            | 468       | 8.11 (2.04)  | 0.3826                             | 6.51 (0.51)          | 161/418<br>(38.5)  | 0.2513               | 154/382<br>(40.3)  | 0.2673               | 138/364<br>(37.9)  | 0.0304               | 138/348<br>(39.7)  | 0.0710               |
|                           | ≥23.79 to <27.55  | 481       | 7.99 (1.68)  |                                    | 6.48 (0.45)          | 153/428<br>(35.7)  |                      | 137/395<br>(34.7)  |                      | 117/372<br>(31.5)  |                      | 113/360<br>(31.4)  |                      |
|                           | ≥27.55            | 477       | 8.15 (1.77)  |                                    | 6.54 (0.58)          | 139/421<br>(33.0)  |                      | 151/406<br>(37.2)  |                      | 155/383<br>(40.5)  |                      | 128/357<br>(35.9)  |                      |
| HbA1c, %                  | <7                | 454       | 6.58 (0.28)  | 0.0001                             | 6.17 (0.25)          | 133/389<br>(34.2)  | 0.6427               | 122/355<br>(34.4)  | 0.2506               | 117/345<br>(33.9)  | 0.1711               | 108/333<br>(32.4)  | 0.2369               |
|                           | ≥7 to <8.2        | 494       | 7.42 (0.33)  |                                    | 6.54 (0.37)          | 163/438<br>(37.2)  |                      | 162/424<br>(38.2)  |                      | 148/401<br>(36.9)  |                      | 148/385<br>(38.4)  |                      |
|                           | ≥8.2              | 481       | 10.19 (1.67) |                                    | 6.77 (0.49)          | 148/405<br>(36.5)  |                      | 149/370<br>(40.3)  |                      | 140/343<br>(40.8)  |                      | 117/320<br>(36.6)  |                      |
| Diabetes complications    | No                | 1236      | 7.98 (1.77)  | 0.0001                             | 6.47 (0.50)          | 389/1104<br>(35.2) | 0.2602               | 382/1035<br>(36.9) | 0.3238               | 356/982<br>(36.3)  | 0.4000               | 325/933<br>(34.8)  | 0.1492               |
|                           | Yes               | 193       | 8.78 (2.07)  |                                    | 6.73 (0.55)          | 66/166<br>(39.8)   |                      | 62/151<br>(41.1)   |                      | 56/140<br>(40.0)   |                      | 56/135<br>(41.5)   |                      |
| CVD                       | No                | 1338      | 8.12 (1.85)  | 0.0002                             | 6.51 (0.52)          | 433/1185<br>(36.5) | 0.0603               | 416/1109<br>(37.5) | 0.9034               | 386/1051<br>(36.7) | 1.0000               | 362/999<br>(36.2)  | 0.1548               |
|                           | Yes               | 91        | 7.5 (1.46)   |                                    | 6.43 (0.43)          | 22/85 (25.9)       |                      | 28/77<br>(36.4)    |                      | 26/71<br>(36.6)    |                      | 19/69<br>(27.5)    |                      |

|                                  | Baseline category | N    | HbA1c (%)   |                      | Individualized target HbA1c (%) | Target attainment  |         |                      |         |                      |         |                      |         |
|----------------------------------|-------------------|------|-------------|----------------------|---------------------------------|--------------------|---------|----------------------|---------|----------------------|---------|----------------------|---------|
|                                  |                   |      | Baseline    |                      |                                 | 6 months           |         | 12 months            |         | 18 months            |         | 24 months            |         |
|                                  |                   |      | Mean (SD)   | p-value <sup>†</sup> |                                 | Mean (SD)          | n/N (%) | P-value <sup>‡</sup> | n/N (%) | P-value <sup>‡</sup> | n/N (%) | P-value <sup>‡</sup> | n/N (%) |
| Dyslipidemia                     | No                | 591  | 8.34 (1.93) | 0.0001               | 6.57 (0.57)                     | 208/527<br>(39.5)  | 0.0241  | 197/488<br>(40.4)    | 0.0879  | 168/462<br>(36.4)    | 0.8505  | 162/442<br>(36.7)    | 0.6040  |
|                                  | Yes               | 838  | 7.9 (1.74)  |                      | 6.46 (0.47)                     | 247/743<br>(33.2)  |         | 247/698<br>(35.4)    |         | 244/660<br>(37.0)    |         | 219/626<br>(35.0)    |         |
| Hypertension                     | No                | 694  | 8.43 (1.99) | 0.0001               | 6.57 (0.59)                     | 212/614<br>(34.5)  | 0.3798  | 185/567<br>(32.6)    | 0.0012  | 168/540<br>(31.1)    | 0.0002  | 162/508<br>(31.9)    | 0.0151  |
|                                  | Yes               | 735  | 7.76 (1.61) |                      | 6.45 (0.42)                     | 243/656<br>(37.0)  |         | 259/619<br>(41.8)    |         | 244/582<br>(41.9)    |         | 219/560<br>(39.1)    |         |
| Other comorbidities <sup>¶</sup> | No                | 973  | 8.21 (1.91) | 0.0001               | 6.53 (0.55)                     | 296/855<br>(34.6)  | 0.2122  | 292/803<br>(36.4)    | 0.2759  | 264/764<br>(34.6)    | 0.0286  | 252/720<br>(35.0)    | 0.5397  |
|                                  | Yes               | 456  | 7.81 (1.61) |                      | 6.46 (0.43)                     | 159/415<br>(38.3)  |         | 152/383<br>(39.7)    |         | 148/358<br>(41.3)    |         | 129/348<br>(37.1)    |         |
| Diabetes specialist              | No                | 813  | 7.88 (1.77) | 0.0001               | 6.41 (0.44)                     | 226/718<br>(31.5)  | 0.0003  | 227/668<br>(34.0)    | 0.0054  | 216/631<br>(34.2)    | 0.0531  | 206/597<br>(34.5)    | 0.4030  |
|                                  | Yes               | 616  | 8.35 (1.89) |                      | 6.64 (0.57)                     | 229/552<br>(41.5)  |         | 217/518<br>(41.9)    |         | 196/491<br>(39.9)    |         | 175/471<br>(37.2)    |         |
| Cardiologist                     | No                | 1128 | 8.18 (1.85) | 0.0001               | 6.56 (0.53)                     | 382/1007<br>(37.9) | 0.0024  | 370/934<br>(39.6)    | 0.0033  | 338/889<br>(38.0)    | 0.0796  | 308/838<br>(36.8)    | 0.1630  |
|                                  | Yes               | 301  | 7.73 (1.74) |                      | 6.32 (0.40)                     | 73/263<br>(27.8)   |         | 74/252<br>(29.4)     |         | 74/233<br>(31.8)     |         | 73/230<br>(31.7)     |         |

ANOVA, analysis of variance; BMI, body mass index; CVD, cardiovascular disease; HbA1c, hemoglobin A1c

<sup>†</sup>Calculated using Welch's test and one-way ANOVA for pairwise and multiple comparison, respectively

<sup>‡</sup>Calculated using Fisher's exact test and Chi-square test for pairwise and multiple comparison, respectively

<sup>§</sup>Patients with available HbA1c data were included in this analysis.

<sup>¶</sup>Most common comorbidities were liver disease, cerebrovascular disease, atrial fibrillation, chronic kidney disease and peptic ulcer disease, excluding those categorized as diabetes complications, CVD, dyslipidemia and hypertension

**Table S3.** Glycemic control by treatment regimen at each time point

|              |                  | HbA1c (%), mean (SD) |             |             |             | HbA1c <target <sup>†</sup> , n/N (%) |                    |                    |                    |
|--------------|------------------|----------------------|-------------|-------------|-------------|--------------------------------------|--------------------|--------------------|--------------------|
|              |                  | 6 months             | 12 months   | 18 months   | 24 months   | 6 months                             | 12 months          | 18 months          | 24 months          |
| All patients |                  | 6.78 (0.99)          | 6.72 (0.89) | 6.71 (0.84) | 6.73 (0.85) | 455/1270<br>(35.8)                   | 444/1186<br>(37.4) | 412/1122<br>(36.7) | 381/1068<br>(35.7) |
| 1 OAD        | Subtotal         | 6.68 (0.86)          | 6.63 (0.83) | 6.60 (0.73) | 6.64 (0.73) | 377/1021<br>(36.9)                   | 326/866<br>(37.6)  | 286/760<br>(37.6)  | 243/692<br>(35.1)  |
|              | DPP-4i           | 6.65 (0.82)          | 6.62 (0.82) | 6.60 (0.69) | 6.62 (0.69) | 219/586<br>(37.4)                    | 188/508<br>(37.0)  | 155/447<br>(34.7)  | 139/413<br>(33.7)  |
|              | SGLT2i           | 6.68 (0.93)          | 6.63 (0.82) | 6.61 (0.81) | 6.63 (0.81) | 74/202 (36.6)                        | 57/161 (35.4)      | 58/143 (40.6)      | 48/125 (38.4)      |
|              | Metformin        | 6.76 (0.86)          | 6.76 (0.84) | 6.63 (0.66) | 6.70 (0.67) | 60/160 (37.5)                        | 50/133 (37.6)      | 45/113 (39.8)      | 31/101 (30.7)      |
|              | Others           | 6.69 (1.04)          | 6.48 (0.88) | 6.55 (0.93) | 6.60 (0.97) | 24/73 (32.9)                         | 31/64 (48.4)       | 28/57 (49.1)       | 25/53 (47.2)       |
| 2 OADs       | Subtotal         | 7.20 (1.09)          | 6.92 (0.91) | 6.91 (0.83) | 6.85 (0.78) | 44/163 (27.0)                        | 71/206 (34.5)      | 73/225 (32.4)      | 73/217 (33.6)      |
|              | DPP-4i+Metformin | 7.17 (1.00)          | 7.01 (1.10) | 6.91 (0.77) | 6.82 (0.77) | 19/62 (30.6)                         | 28/85 (32.9)       | 30/92 (32.6)       | 35/86 (40.7)       |
|              | DPP-4i+SGLT2i    | 6.95 (0.71)          | 6.74 (0.73) | 6.90 (0.81) | 6.76 (0.74) | 9/34 (26.5)                          | 18/51 (35.3)       | 19/66 (28.8)       | 21/71 (29.6)       |
|              | SGLT2i+Metformin | 7.47 (1.53)          | 6.88 (0.79) | 6.85 (0.83) | 6.91 (0.78) | 7/31 (22.6)                          | 15/36 (41.7)       | 15/36 (41.7)       | 10/33 (30.3)       |
|              | DPP-4i+other OAD | 7.43 (1.17)          | 6.99 (0.79) | 6.84 (0.91) | 7.06 (0.97) | 6/26 (23.1)                          | 9/25 (36.0)        | 7/20 (35.0)        | 6/19 (31.6)        |

|                       |                     |             |             |             |             |               |               |               |               |
|-----------------------|---------------------|-------------|-------------|-------------|-------------|---------------|---------------|---------------|---------------|
|                       | Metformin+other OAD | 6.66 (0.49) | 7.28 (0.62) | 7.55 (0.37) | 7.58 (0.62) | 2/5<br>(40.0) | 0/4<br>(0.0)  | 0/4<br>(0.0)  | 0/4<br>(0.0)  |
|                       | SGLT2i+other OAD    | 7.28 (0.61) | 7.33 (0.90) | 7.44 (1.90) | 7.00 (0.28) | 1/4<br>(25.0) | 1/3<br>(33.3) | 2/5<br>(40.0) | 1/2<br>(50.0) |
|                       | Other combination   | 6.20<br>(-) | 6.40 (0.00) | 6.70 (0.71) | 6.50 (0.14) | 0/1<br>(0.0)  | 0/2<br>(0.0)  | 0/2<br>(0.0)  | 0/2<br>(0.0)  |
| ≥3 OADs               |                     | 7.51 (1.29) | 7.45 (1.32) | 7.20 (1.06) | 7.13 (1.09) | 7/24 (29.2)   | 15/46 (32.6)  | 15/62 (24.2)  | 25/79 (31.6)  |
| Any injectables       |                     | 8.42 (2.77) | 7.32 (1.28) | 7.09 (1.08) | 7.02 (1.56) | 7/14 (50.0)   | 7/19 (36.8)   | 8/19 (42.1)   | 8/18 (44.4)   |
| Unknown/<br>withdrawn |                     | 6.69 (1.07) | 6.47 (0.72) | 6.64 (1.31) | 6.73 (1.35) | 20/48 (41.7)  | 25/49 (51.0)  | 30/56 (53.6)  | 32/62 (51.6)  |

<sup>†</sup>Target HbA1c was set by a physician at baseline

DPP-4i, dipeptidyl peptidase-4 inhibitor; HbA1c, hemoglobin A1c; OAD, oral antidiabetic drug; SGLT2i, sodium-glucose cotransporter-2 inhibitor

**Table S4.** Achievement of HbA1c <7.0% by baseline characteristics

|                           | Baseline category | Baseline HbA1c (%) |             | HbA1c <7.0%          |                 |                      |                 |                      |                 |                      |                 |                      |
|---------------------------|-------------------|--------------------|-------------|----------------------|-----------------|----------------------|-----------------|----------------------|-----------------|----------------------|-----------------|----------------------|
|                           |                   | N                  | Mean (SD)   | p-value <sup>†</sup> | 6 months        |                      | 12 months       |                      | 18 months       |                      | 24 months       |                      |
|                           |                   |                    |             |                      | n/N (%)         | p-value <sup>‡</sup> |
| All patients <sup>§</sup> |                   | 1429               | 8.08 (1.83) |                      | 893/1270 (70.3) |                      | 862/1186 (72.7) |                      | 803/1122 (71.6) |                      | 753/1068 (70.5) |                      |
| Age, years                | <54               | 452                | 8.63 (2.05) | 0.0001               | 258/395 (65.3)  | 0.0008               | 239/364 (65.7)  | 0.0003               | 221/337 (65.6)  | 0.0002               | 185/309 (59.9)  | 0.0001               |
|                           | ≥54, <66          | 460                | 8.15 (1.91) |                      | 280/411 (68.1)  |                      | 285/391 (72.9)  |                      | 260/376 (69.1)  |                      | 261/362 (72.1)  |                      |
|                           | ≥66               | 517                | 7.54 (1.34) |                      | 355/464 (76.5)  |                      | 338/431 (78.4)  |                      | 322/409 (78.7)  |                      | 307/397 (77.3)  |                      |
| Sex                       | Male              | 878                | 8.25 (1.90) | 0.0001               | 532/776 (68.6)  | 0.0892               | 511/717 (71.3)  | 0.1832               | 453/671 (67.5)  | 0.0003               | 417/633 (65.9)  | 0.0001               |
|                           | Female            | 551                | 7.82 (1.69) |                      | 361/494 (73.1)  |                      | 351/469 (74.8)  |                      | 350/451 (77.6)  |                      | 336/435 (77.2)  |                      |
| BMI, kg/m <sup>2</sup>    | <23.79            | 468                | 8.11 (2.04) | 0.3826               | 305/418 (73.0)  | 0.2742               | 287/382 (75.1)  | 0.4022               | 262/364 (72.0)  | 0.9771               | 260/348 (74.7)  | 0.0967               |
|                           | ≥23.79, <27.55    | 481                | 7.99 (1.68) |                      | 299/428 (69.9)  |                      | 283/395 (71.6)  |                      | 266/372 (71.5)  |                      | 248/360 (68.9)  |                      |
|                           | ≥27.55            | 477                | 8.15 (1.77) |                      | 286/421 (67.9)  |                      | 289/406 (71.2)  |                      | 273/383 (71.3)  |                      | 242/357 (67.8)  |                      |
| HbA1c, %                  | <7                | 454                | 6.58 (0.28) | 0.0001               | 367/389 (94.3)  | 0.0001               | 335/355 (94.4)  | 0.0001               | 313/345 (90.7)  | 0.0001               | 300/333 (90.1)  | 0.0001               |

|                        | Baseline category | Baseline HbA1c (%) |              |                      | HbA1c <7.0%     |                      |                 |                      |                 |                      |                |                      |
|------------------------|-------------------|--------------------|--------------|----------------------|-----------------|----------------------|-----------------|----------------------|-----------------|----------------------|----------------|----------------------|
|                        |                   | N                  | Mean (SD)    | p-value <sup>†</sup> | 6 months        |                      | 12 months       |                      | 18 months       |                      | 24 months      |                      |
|                        |                   |                    |              |                      | n/N (%)         | p-value <sup>‡</sup> | n/N (%)         | p-value <sup>‡</sup> | n/N (%)         | p-value <sup>‡</sup> | n/N (%)        | p-value <sup>‡</sup> |
|                        | ≥7, <8.2          | 494                | 7.42 (0.33)  |                      | 320/438 (73.1)  |                      | 311/424 (73.3)  |                      | 295/401 (73.6)  |                      | 261/385 (67.8) |                      |
|                        | ≥8.2              | 481                | 10.19 (1.67) |                      | 184/405 (45.4)  |                      | 190/370 (51.4)  |                      | 178/343 (51.9)  |                      | 171/320 (53.4) |                      |
| Diabetes complications | No                | 1236               | 7.98 (1.77)  | 0.0001               | 795/1104 (72.0) | 0.0010               | 767/1035 (74.1) | 0.0060               | 717/982 (73.0)  | 0.0066               | 671/933 (71.9) | 0.0113               |
|                        | Yes               | 193                | 8.78 (2.07)  |                      | 98/166 (59.0)   |                      | 95/151 (62.9)   |                      | 86/140 (61.4)   |                      | 82/135 (60.7)  |                      |
| CVD                    | No                | 1338               | 8.12 (1.85)  | 0.0002               | 827/1185 (69.8) | 0.1408               | 800/1109 (72.1) | 0.1147               | 746/1051 (71.0) | 0.1033               | 703/999 (70.4) | 0.7858               |
|                        | Yes               | 91                 | 7.5 (1.46)   |                      | 66/85 (77.6)    |                      | 62/77 (80.5)    |                      | 57/71 (80.3)    |                      | 50/69 (72.5)   |                      |
| Dyslipidemia           | No                | 591                | 8.34 (1.93)  | 0.0001               | 353/527 (67.0)  | 0.0293               | 336/488 (68.9)  | 0.0143               | 312/462 (67.5)  | 0.0129               | 297/442 (67.2) | 0.0484               |
|                        | Yes               | 838                | 7.9 (1.74)   |                      | 540/743 (72.7)  |                      | 526/698 (75.4)  |                      | 491/660 (74.4)  |                      | 456/626 (72.8) |                      |
| Hypertension           | No                | 694                | 8.43 (1.99)  | 0.0001               | 387/614 (63.0)  | 0.0001               | 365/567 (64.4)  | 0.0001               | 343/540 (63.5)  | 0.0001               | 330/508 (65.0) | 0.0002               |
|                        | Yes               | 735                | 7.76 (1.61)  |                      | 506/656 (77.1)  |                      | 497/619 (80.3)  |                      | 460/582 (79.0)  |                      | 423/560 (75.5) |                      |



|                                  | Baseline category | Baseline HbA1c (%) |             | HbA1c <7.0%          |                 |                      |                |                      |                |                      |                |                      |
|----------------------------------|-------------------|--------------------|-------------|----------------------|-----------------|----------------------|----------------|----------------------|----------------|----------------------|----------------|----------------------|
|                                  |                   | N                  | Mean (SD)   | 6 months             |                 | 12 months            |                | 18 months            |                | 24 months            |                |                      |
|                                  |                   |                    |             | p-value <sup>†</sup> | n/N (%)         | p-value <sup>‡</sup> | n/N (%)        | p-value <sup>‡</sup> | n/N (%)        | p-value <sup>‡</sup> | n/N (%)        | p-value <sup>‡</sup> |
| Other comorbidities <sup>¶</sup> | No                | 973                | 8.21 (1.91) | 0.0001               | 583/855 (68.2)  | 0.0184               | 568/803 (70.7) | 0.0308               | 528/764 (69.1) | 0.0085               | 500/720 (69.4) | 0.2837               |
|                                  | Yes               | 456                | 7.81 (1.61) |                      | 310/415 (74.7)  |                      | 294/383 (76.8) |                      | 275/358 (76.8) |                      | 253/348 (72.7) |                      |
| Diabetes specialist              | No                | 813                | 7.88 (1.77) | 0.0001               | 528/718 (73.5)  | 0.0044               | 506/668 (75.7) | 0.0085               | 470/631 (74.5) | 0.0163               | 435/597 (72.9) | 0.0588               |
|                                  | Yes               | 616                | 8.35 (1.89) |                      | 365/552 (66.1)  |                      | 356/518 (68.7) |                      | 333/491 (67.8) |                      | 318/471 (67.5) |                      |
| Cardiologist                     | No                | 1128               | 8.18 (1.85) | 0.0001               | 695/1007 (69.0) | 0.0490               | 667/934 (71.4) | 0.0668               | 618/889 (69.5) | 0.0026               | 578/838 (69.0) | 0.0411               |
|                                  | Yes               | 301                | 7.73 (1.74) |                      | 198/263 (75.3)  |                      | 195/252 (77.4) |                      | 185/233 (79.4) |                      | 175/230 (76.1) |                      |

ANOVA, analysis of variance; BMI, body mass index; CVD, cardiovascular disease; HbA1c, hemoglobin A1c

<sup>†</sup>Calculated using Welch's test and one-way ANOVA for pairwise and multiple comparison, respectively

<sup>‡</sup>Calculated using Fisher's exact test and Chi-square test for pairwise and multiple comparison, respectively

<sup>§</sup>Patients with available HbA1c data were included in this analysis.

<sup>¶</sup>Most common comorbidities were liver disease, cerebrovascular disease, atrial fibrillation, chronic kidney disease and peptic ulcer disease, excluding those categorized as diabetes complications, CVD, dyslipidemia and hypertension.

**Figure S1.** Patient disposition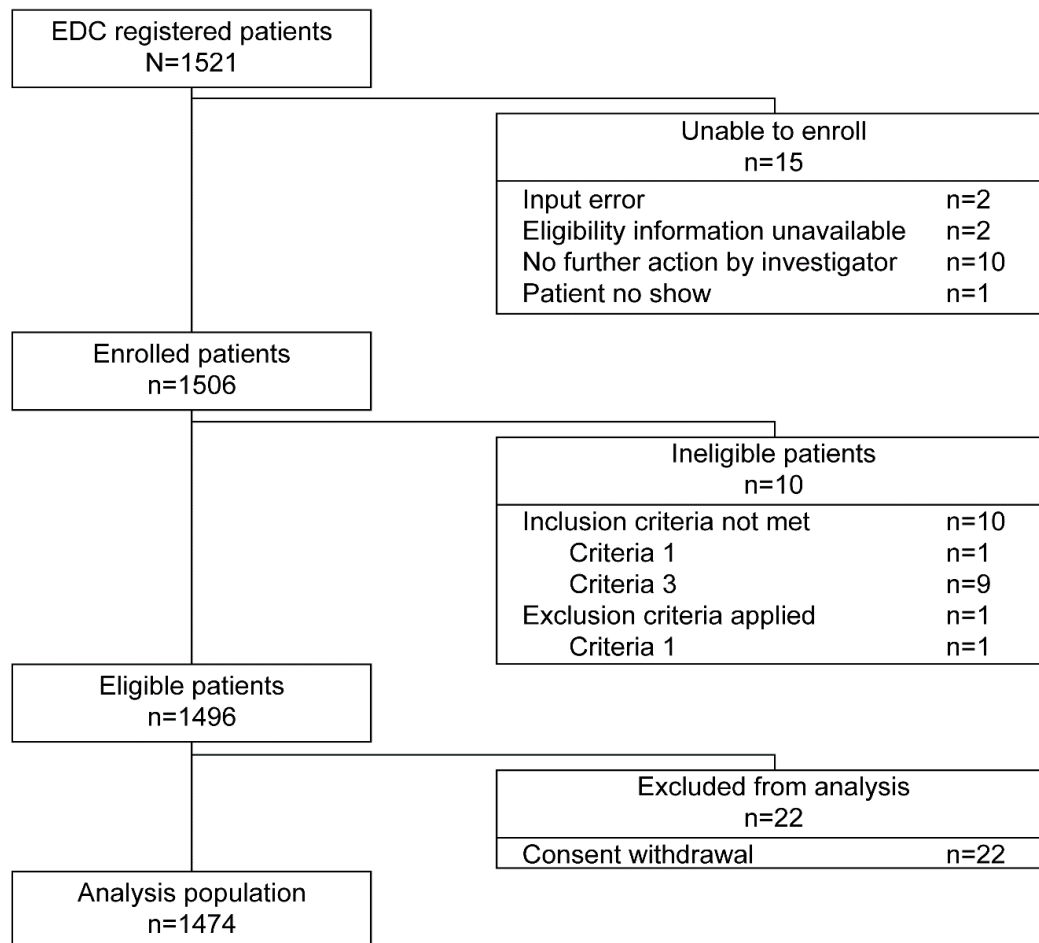

Inclusion criterion 1: Japanese adult patients with a diagnosis of T2DM by a physician; inclusion criterion 3: treatment-naïve patients who were newly initiating an OAD as monotherapy; exclusion criteria 1: type 1 diabetes, gestational diabetes or other form of secondary diabetes

One patient met both an inclusion criterion and an exclusion criterion at the same time

EDC, electronic data capture; OAD, oral antidiabetic drug; T2DM, type 2 diabetes mellitus

**Figure S2.** Distribution of treatment regimens over time according to baseline OAD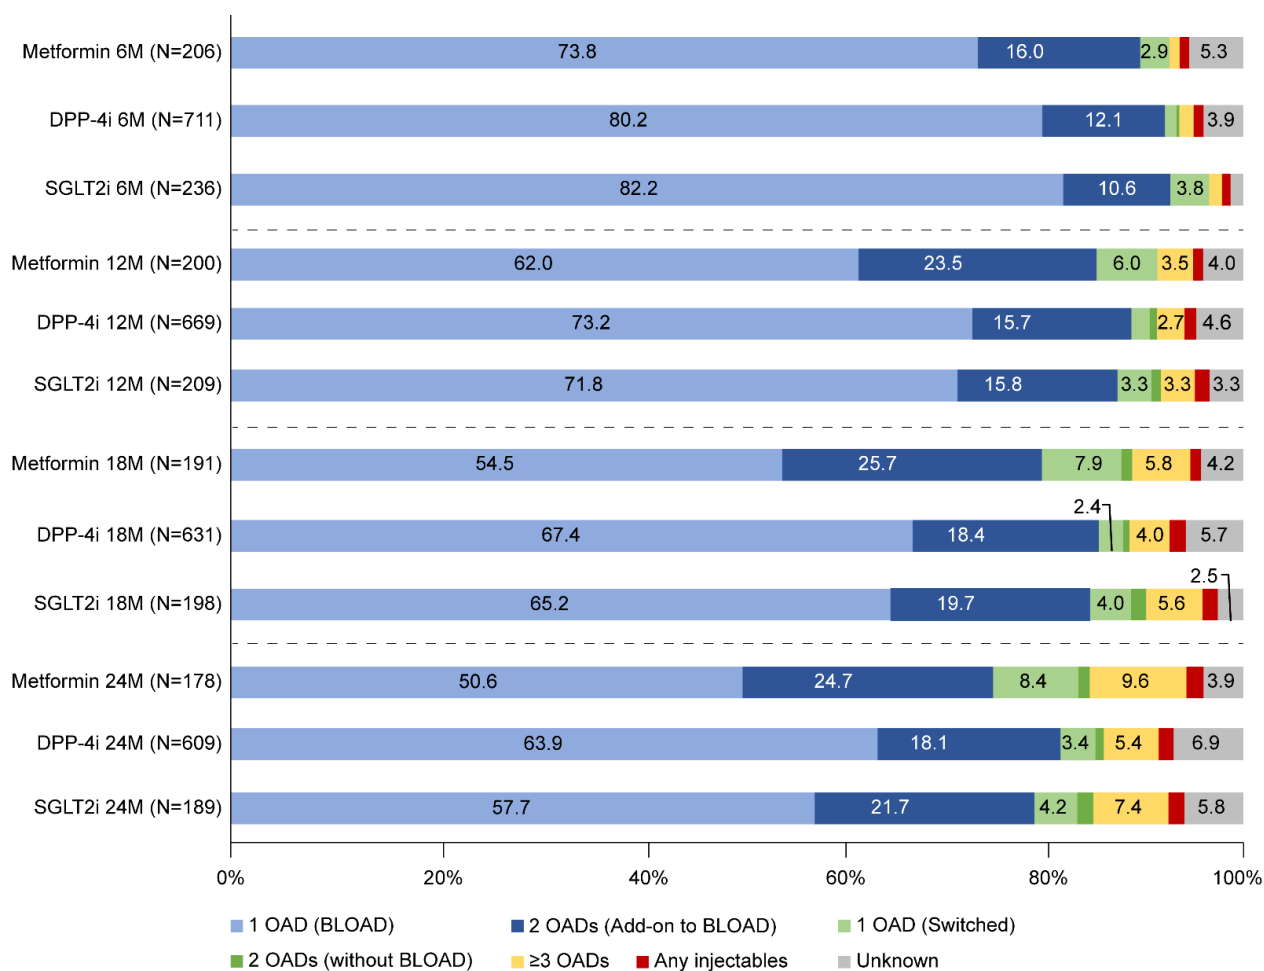

Data <2% are not shown.

BLOAD, baseline oral antidiabetic agent; DPP-4i, dipeptidyl peptidase-4 inhibitor; M, month; OAD, oral antidiabetic drug; SGLT2i, sodium-glucose cotransporter-2 inhibitor; unknown group refers to patients who had prescribing information unavailable during follow-up.
